# Supplementary material for: High-Throughput Sequencing to Investigate Phytopathogenic Fungal Propagules Caught in Baited Insect Traps
Source: MDPI journal article supplement (doi:10.3390/jof5010015), 2019-02-12
Supplement: s1 [file s1]

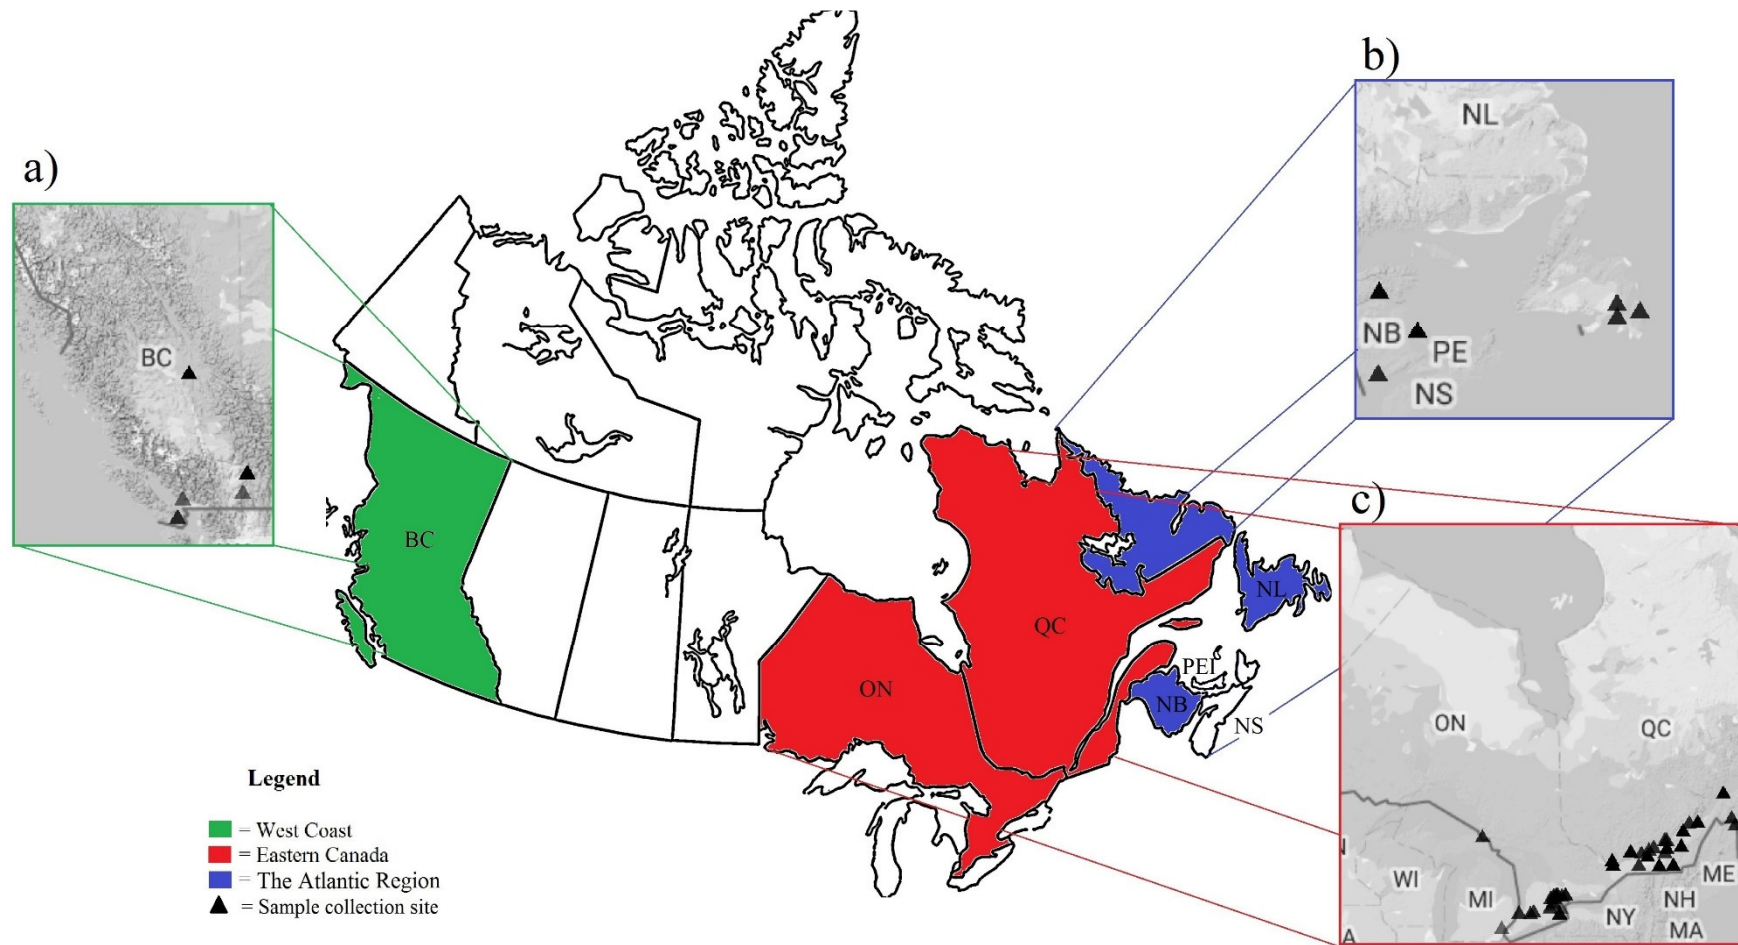

**Supplementary Figure S1:** Sampling sites in Canada; a) West Coast, b) the Atlantic Region, and c) Eastern Canada. Adapted from Google Earth

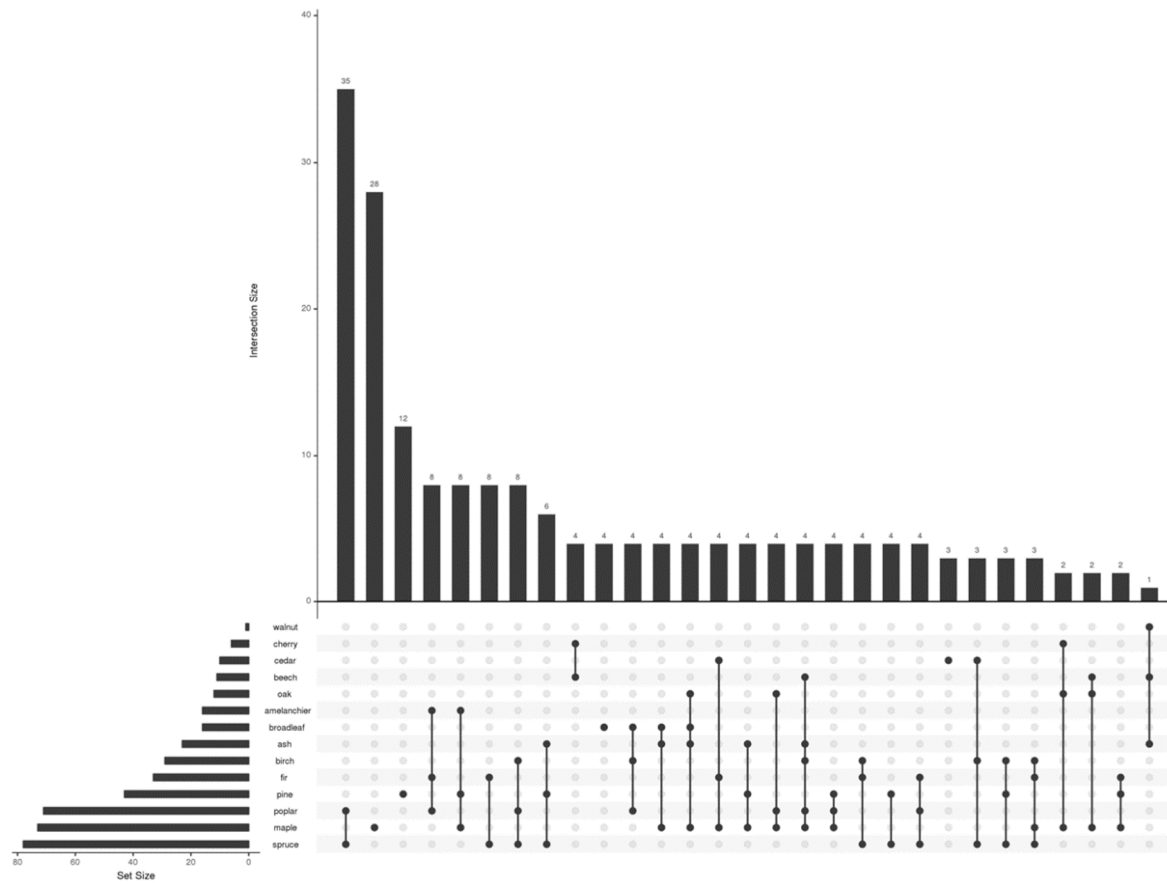

**Supplementary Figure S2:** Upset plot to visualize a few types of trees that surrounded the sample traps (including the trees from which traps were suspended). The intersection size number represents the number of times a specific tree combination was found (similar to a Venn diagram), and the set size number corresponds to the number of samples surrounded by a specific type of tree. Most samples were collected from traps placed in forested areas comprising more than one tree species.

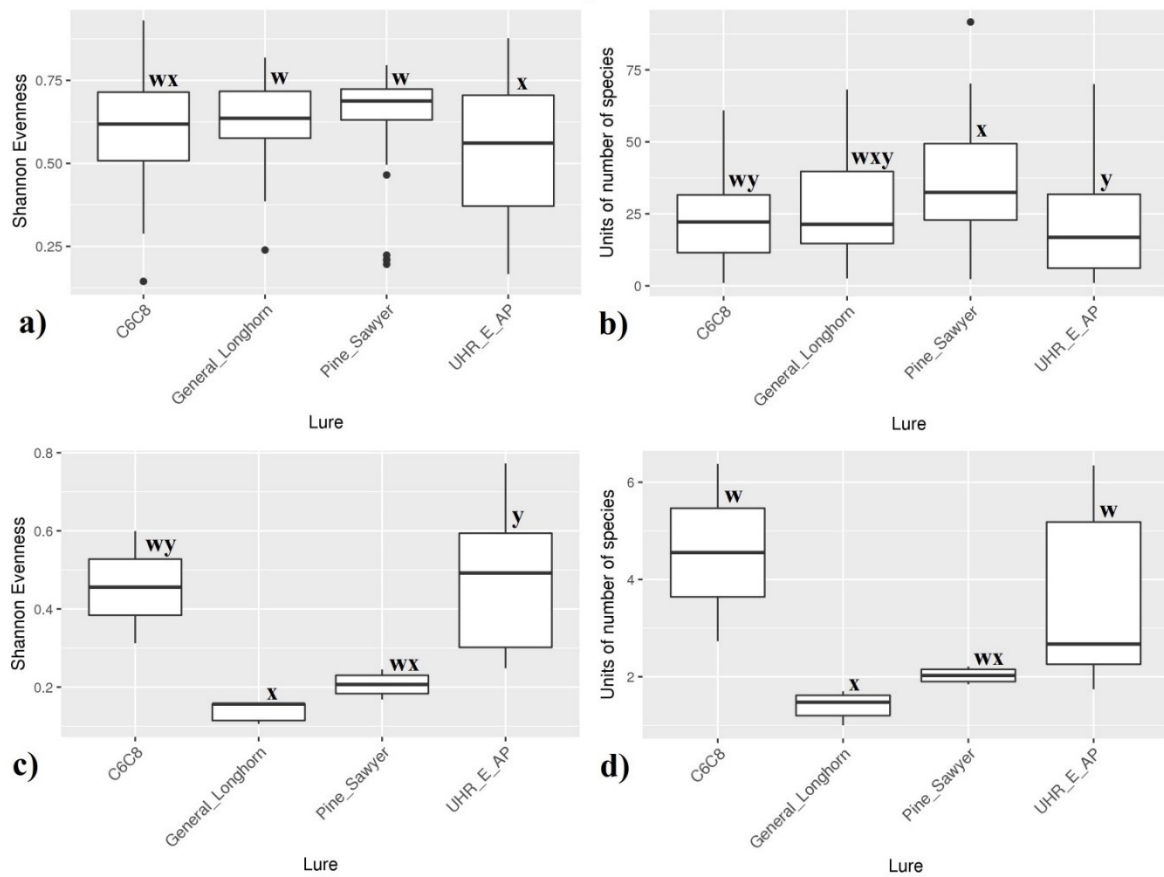

**Supplementary Figure S3:** Fungal species a) evenness (Shannon) and b) true diversity (Shannon) by semiochemical type, and oomycete species c) evenness (Shannon) and d) true diversity (Shannon) by semiochemical type. The ITS1 sequences were used. Pairwise comparison significance calculated with t tests ( $P$  value < 0.05 ( $\alpha$ )). Different letters (wxy) show a significant difference between the boxplots compared whereas shared letters represent non-significantly different boxplots.

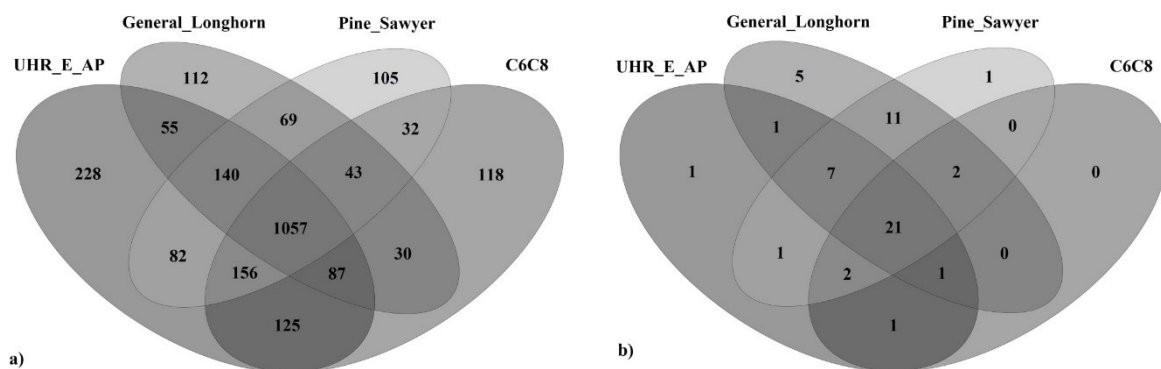

**Supplementary Figure S4:** Venn diagram of a) fungal species shared or unique to the semiochemical type employed in insect traps prior to species subtraction and b) oomycete species shared or unique to the semiochemical type employed in insect traps prior to species subtraction. All were obtained by amplifying the ITS1 genic region.

Supplementary Material S1: Semiochemicals' composition and additional details.

Each lure set (i.e., C<sub>6</sub>C<sub>8</sub>, UHR\_E\_AP, General Longhorn, and Pine Sawyer) was placed on separate traps.

#### First semiochemical set: C<sub>6</sub>C<sub>8</sub>.

The first combination (C<sub>6</sub>C<sub>8</sub>) consisted of racemic 3-hydroxyhexan-2-one (C<sub>6</sub>) (Bedoukian Research Inc., Danbury, CT, USA), racemic 3-hydroxyoctan-2-one (C<sub>8</sub>) (Bedoukian Research Inc.), and ultra-high release ethanol (UHR EtoH), where each chemical was placed within individual release devices. C<sub>6</sub> and C<sub>8</sub> were verified 99% pure by gas chromatography–mass spectrometry (GC-MS) by the Canadian Forest Service, and loaded into polyethylene pouches by Contech Inc (Delta, BC, Canada). Each pouch contained 1.4 g of either C<sub>6</sub> or C<sub>8</sub>. The release rates (at 20°C) were 20 mg/d for C<sub>6</sub>, and 25 mg/d for C<sub>8</sub>. Two C<sub>6</sub> and two C<sub>8</sub> pouches (semiochemicals) were both placed on a trap to obtain cumulative release rates of 40 to 50 mg/d.

#### Second semiochemical set: UHR\_E\_AP.

The second semiochemical set (UHR\_E\_AP) consisted of UHR EtoH and UHR alpha-pinene. The two chemicals were loaded into separate release devices and placed on an insect trap. The UHR ethanol (95% purity, 121.5 g loaded/pouch) and UHR alpha-pinene [95% (-) enantiomer, 172 g/pouch] lures (Contech Inc., Delta, BC, Canada) had release rates (at 20°C) of 275 mg/d and 2 g/d, respectively. The UHR ethanol and UHR alpha-pinene chemicals were exactly the same throughout this project.

#### Third semiochemical set: General Longhorn.

The lure set consisted of UHR EtoH, (*E*)-6,10-dimethyl-5,9-undecadien-2-ol (*E*-fusicumol) and (*E*)-6,10-dimethyl-5,9-undecadien-2-yl (*E*-fusicumol acetate). Both *E*-fusicumol and *E*-fusicumol acetate were synthesized by Bedoukian Research Inc. and placed into polyethylene bubble caps by Contech Inc.; 130 mg/bubble cap of *E*-fusicumol (release rate = 1 mg/d), and 200 mg/bubble cap of *E*-fusicumol acetate (release rate = 2 mg/d).

#### Fourth semiochemical set: Pine Sawyer.

The Pine Sawyer lure set included four separate components consisting of 2-undecyloxy-1-ethanol (monochamol), UHR EtoH, UHR alpha-pinene and racemic 2-methyl-6-methylene-7-octen-4-ol (iposenol). Monochamol (99.3% purity, 0.025 g/bubble cap) and racemic iposenol (>99% purity, 0.04 g/bubble cap) were also purchased from Contech Inc. and had release rates (20°C) of 0.2 mg/d and 0.4 mg/d, respectively.

#### **Supplementary Material S2: Fungal OTU, prior to species subtraction.**

The most abundant fungi for all semiochemical treatments at the phylum, genus and species (top 10 per semiochemical) taxonomic levels are listed in Supplementary Table S4.

From the 2439 different species OTU detected prior to the species subtraction, 1057 (43%) were common to all semiochemical types, 228 species (9%) were unique to the UHR\_E\_AP semiochemical, 112 (4.6%) were unique to General Longhorn, 105 (4.3%) were unique to Pine Sawyer, and 118 (4.8%) were unique to the C<sub>6</sub>C<sub>8</sub> semiochemical (Supplementary Figure S4a).

To visualize sampling depth, examples of the rarefaction curves obtained for the spore traps (negative control) and their respective original insect dataset, and subtracted insect dataset are shown in Supplementary Figure S5. The spore trap data demonstrated the highest sequencing depth as saturation was obtained for all of the samples tested with a sequence number per species ranging between approximately 5,000 and 25,000 (sequences). The lowest species number obtained by all samples tested was just below 150. In contrast, only part of the samples from both the original insect and the subtracted data reached saturation in their respective rarefaction curves.

### **Supplementary Material S3: Oomycetes OTU, prior to species subtraction.**

The most abundant oomycetes for all semiochemical treatments at the phylum, genus and species (top 10 per semiochemical) taxonomic levels can be found in Supplementary Table S6. Prior to species subtraction, of the total 54 different OTU, there were 21 species detected in all semiochemical types but few were unique to each treatment (Supplementary Figure S4b). *Pythium monospermum* was unique to traps baited with the UHR\_E\_AP semiochemical. *Pythium oligandrum* was unique to traps baited with the Pine Sawyer semiochemical. Five species were unique to traps baited with the General Longhorn semiochemical (*Peronospora* sp. UPS F-119986, *P. flava*, *P. sparsa*, *Pythium carolinianum*, and *Phytophthora* spp.). No unique species were recovered from traps baited with the C<sub>6</sub>C<sub>8</sub> semiochemical. Within the top ten most abundant species identified, all semiochemicals except C<sub>6</sub>C<sub>8</sub> (0.67%) had a high percentage of *Peronospora manshurica* (Supplementary Table S6). The UHR\_E\_AP (26.1%) and C<sub>6</sub>C<sub>8</sub> (26.6%) semiochemicals had a considerably higher number of OTU unclassified below genus compared with General Longhorn (traces) and Pine Sawyer (3.02%). Additionally, ATP9-NAD9 OTU from the original dataset generated prior to the species subtraction could only recover *Phytophthora* spp. from traps baited with the C<sub>6</sub>C<sub>8</sub> and UHR\_E\_AP semiochemicals. *Phytophthora cryptogea* could only be detected from traps baited with the UHR\_E\_AP semiochemical, whereas *P. foliorum*, *Phytophthora* sp. “*kelmania*” [87] and *P. syringae* were associated with both C<sub>6</sub>C<sub>8</sub> and UHR\_E\_AP lures.

**Supplementary Table S1:** Summary of the samples collected from 2013 to 2015. Specific details associated with samples available upon request.

| Semiochemical <sup>a</sup>    | Year | Number of samples | Canadian provinces                                                             |
|-------------------------------|------|-------------------|--------------------------------------------------------------------------------|
| UHR_E_AP                      | 2013 | 13                | British Columbia, New Brunswick, Newfoundland and Labrador, Ontario and Quebec |
|                               | 2014 | 26                | Ontario and Quebec                                                             |
| C <sub>6</sub> C <sub>8</sub> | 2013 | 13                | British Columbia, New Brunswick, Newfoundland and Labrador, Ontario and Quebec |
|                               | 2014 | 23                |                                                                                |
| General Longhorn              | 2015 | 17                | Ontario and Quebec                                                             |
| Pine Sawyer                   |      | 16                |                                                                                |
| Total:                        | 3    | 108               | 5 Canadian provinces                                                           |

<sup>a</sup>**UHR\_E\_AP** = Combination of two semiochemicals (ultra-high release (UHR) ethanol and UHR alpha-pinene) that attract a wide range of bark and wood-boring insects [50,56,57].

**C<sub>6</sub>C<sub>8</sub>** = Combination of three semiochemicals (racemic 3-hydroxyhexan-2-one, racemic 3-hydroxyoctan-2-one, and UHR ethanol). The first two chemicals are aggregation pheromones of some longhorned beetles in the Cerambycinae subfamily [55] but, the addition of UHR ethanol increases attraction to other wood-boring insects.

**General Longhorn** = Combination of three semiochemicals (UHR ethanol, (E)-6,10-dimethyl-5,9-undecadien-2-ol (E-fuscumol), and (E)-6,10-dimethyl-5,9-undecadien-2-yl (E-fuscumol acetate)) used to attract Spondylidinae, Lamiinae, and Scolytinae beetles [58,59,72].

**Pine Sawyer** = Combination of four semiochemicals (2-undecyloxy-1-ethanol (monochamol), UHR ethanol, UHR alpha-pinene, and racemic 2-methyl-6-methylene-7-octen-4-ol (ipsenol)) used to attract longhorned beetles (*Monochamus*) and bark and ambrosia beetles due to the added ethanol and alpha-pinene [48,60,61].

**Supplementary Table S2:** Presence or absence of amplification as detected by gel electrophoreses using barcoded bidirectional PCR products from 108 environmental insect samples by targeted organisms, and the percentages of positive reactions obtained respectively with each bidirectional primer used.

| Primer used to append barcodes <sup>a</sup> | Organism                | Target region <sup>b</sup> | Positive PCR | Total PCR | Positive (%) <sup>c</sup> |
|---------------------------------------------|-------------------------|----------------------------|--------------|-----------|---------------------------|
| ITS1-Forward                                | Fungi                   | ITS1                       | 90           | 108       | 84                        |
| ITS1-Reverse                                | Fungi                   |                            | 98           | 108       | 91                        |
| ITS1-Forward                                | Oomycete                |                            | 12           | 108       | 11                        |
| ITS1-Reverse                                | Oomycete                |                            | 12           | 108       | 11                        |
| ATP9-NAD9- forward                          | <i>Phytophthora</i> sp. | ATP9-NAD9                  | 8            | 20        | 40                        |
| Total                                       | ...                     | ...                        | 220          | 452       | Average: 47               |

<sup>a</sup>Each PCR included a set of primers but, as presented by Tremblay et al. [62], bidirectional sequencing required one primer per direction to append the sample and organism index (i.e., barcode).

<sup>b</sup>ITS1 = internal transcribed spacer 1 and ATP9-NAD9 = adenosine triphosphate synthase subunit 9-nicotinamide adenine dinucleotide dehydrogenase subunit 9 spacer.

<sup>c</sup>Percentage of the number of positive PCR over the total number of reactions done.

**Supplementary Table S3:** Exotic and native fungal species of interest that are unique to a semiochemical (i.e., post species subtraction), and grouped by the potential damage (= trophic status of concern) associated with those fungi. Also included is a risk level scale in terms of virulence. Identifications based on the ITS1 sequences obtained.

|                                 | Known damage                                            | Semiochemical <sup>a</sup> |                  |                               |          | Presence status <sup>b</sup> | Risk level <sup>c</sup> | Known host(s)                                                                                                 | References             |
|---------------------------------|---------------------------------------------------------|----------------------------|------------------|-------------------------------|----------|------------------------------|-------------------------|---------------------------------------------------------------------------------------------------------------|------------------------|
|                                 |                                                         | Pine sawyer                | General Longhorn | C <sub>6</sub> C <sub>8</sub> | UHR_E_AP |                              |                         |                                                                                                               |                        |
| <b>plant pathogen</b>           |                                                         |                            |                  |                               |          |                              |                         |                                                                                                               |                        |
| <i>Ambrosiella ferruginea</i>   | galleries and wounds caused by insect vector (mycangia) | x                          |                  |                               |          | N, C                         | 2                       | conifers and deciduous trees                                                                                  | [135]                  |
| <i>Ciborinia whetzeli</i>       | anthracnose and ink spot disease                        |                            |                  | x                             |          | N, C                         | 2                       | aspen and cottonwood                                                                                          | [136-138]              |
| <i>Colletotrichum fructi</i>    | anthracnose                                             |                            |                  |                               | x        | N                            | 2                       | over 30 plant genera<br>grapevine, pepper, black locust, strawberry, water lily, apple, crab apple and protea | [139,140]              |
| <i>Colletotrichum nymphaeae</i> | anthracnose, leaf spot, and bitter rot                  |                            |                  |                               | x        | N                            | 2                       | citrus orthezia                                                                                               | [141-144]              |
| <i>Devriesia americana</i>      | insect pathogen unknown                                 |                            |                  | x                             |          | N                            | 2 <sup>d</sup>          | unknown                                                                                                       | [145]                  |
| <i>Devriesia strelitzicola</i>  | death of leaves                                         |                            |                  |                               | x        | E                            | 2                       | <i>Strelitzia</i> spp.                                                                                        | [146,147]<br>[148-151] |
| <i>Erysiphe adunca</i>          |                                                         | x                          |                  |                               |          | N, C                         | 2                       | <i>Populus</i> spp. and willow                                                                                | [94,152]               |
| <i>Erysiphe convolvuli</i>      | powdery mildew                                          |                            |                  |                               | x        | N, C                         | 2                       | <i>Calystegia</i> spp. and <i>Convolvulus</i> spp.                                                            | [127]                  |



|                                   |                                   |   |   |   |      |    |                                                                                                                                                |                    |
|-----------------------------------|-----------------------------------|---|---|---|------|----|------------------------------------------------------------------------------------------------------------------------------------------------|--------------------|
| <i>Erysiphe cruciferarum</i>      |                                   |   | x |   | N, C | 2  | mustard, cabbage, bok choy, and turnip                                                                                                         | [153]              |
| <i>Erysiphe diffusa</i>           |                                   |   |   | x | N    | 2  | soybean and legumes                                                                                                                            | [154,155]          |
| <i>Erysiphe elevata</i>           |                                   |   | x |   | N    | 2  | flowering trees                                                                                                                                | [156,157]          |
| <i>Golovinomyces depressus</i>    |                                   |   | x |   | E    | 2  | numerous plants in the Asteraceae family                                                                                                       | [94,127,152]       |
| <i>Neoerysiphe galeopsidis</i>    |                                   |   |   | x | N, C | 2  | wild basil, nettle, white turtlehead, and mint serviceberry, hawthorn, purple loosestrife, crab apple, apricot, cherry, plum, peach and spirea | [136,153,158, 159] |
| <i>Podosphaera clandestina</i>    |                                   |   | x |   | N, C | 2  | apple, and crab apple                                                                                                                          | [102,136,158]      |
| <i>Podosphaera leucotricha</i>    |                                   |   |   | x | N, C | 2  | apple                                                                                                                                          | [102,136,153]      |
| <i>Podosphaera lini</i>           |                                   |   |   | x | E    | 2  | flax                                                                                                                                           | [127,152,160]      |
| <i>Podosphaera negeri</i>         |                                   |   | x |   | E    | 2  | flowering shrubs                                                                                                                               | [152,161]          |
| <i>Echinodontium tinctorium</i>   | heart rot and brown stringy rot   |   | x |   | N, C | 3  | hemlock, fir, and cedar                                                                                                                        | [102,136,162, 163] |
| <i>Leptographium</i> sp.          | blue stain and sapstain           | x |   |   | N, C | 1? | conifer and hardwood                                                                                                                           | [104-108,164]      |
| <i>Lirula macrospora</i>          | needle cast                       |   | x |   | N, C | 3  | spruce                                                                                                                                         | [136,165]          |
| <i>Meria laricis</i>              |                                   | x |   |   | N, C | 3  | larch                                                                                                                                          | [102,166]          |
| <i>Mollisia dextrinospora</i>     | eyespot of cereal                 |   |   | x | E    | 2  | cereals                                                                                                                                        | [167-169]          |
| <i>Mycosphaerella areola</i>      | areolate mildew                   |   | x |   | N    | 3  | cotton                                                                                                                                         | [127,170]          |
| <i>Phaeo-cremonium inflatipes</i> | wilt and decline                  | x |   |   | N    | 1? | <i>Quercus</i> spp., <i>Nectandra</i> spp., whitebeam, vine, and quince                                                                        | [19,127,171- 173]  |
| <i>Phoma glomerata</i>            | blight, leaf spots, and fruit rot |   | x |   | N, C | 2  | over 80 different plants                                                                                                                       | [127,136,174- 176] |

|                                    |                           |   |   |   |      |     |                                                                                                |                           |
|------------------------------------|---------------------------|---|---|---|------|-----|------------------------------------------------------------------------------------------------|---------------------------|
| <i>Pucciniastrum circaeae</i>      | rust                      |   | x |   | E    | 2   | shrubs, fir and<br><i>Circaea</i> spp.                                                         | [127,177]                 |
| <i>Septoria gladioli</i>           | leaf spot and hard<br>rot |   |   | x | N, C | 2   | flowers and corn                                                                               | [102,136,178]             |
| <i>Sirococcus conigenus</i>        | shoot blight              |   | x |   | N, C | 2   | pine, spruce, fir,<br>and hemlock                                                              | [102,179,180]             |
| <i>Sirococcus piceicola</i>        |                           |   | x |   | N, C | 2   | spruce                                                                                         | [180,181]                 |
| <i>Stagonospora pseudopaludosa</i> |                           |   |   | x | E    | 3   | grass                                                                                          | [182]                     |
| <i>Teratosphaeria xenocryptica</i> | leaf spot                 |   |   | x | E    | 2   | eucalyptus                                                                                     | [183,184]                 |
| <i>Phyllosticta minima</i>         |                           |   |   | x | N, C | 3   | maple                                                                                          | [94,102,136,1<br>85,186]  |
| <i>Strelitziana mali</i>           | sooty blotch              |   |   | x | E    | 3   | apple and vine                                                                                 | [187-189]                 |
| <i>Taphrina padi</i>               | fruit deformation         | x |   |   | E    | 2   | cherry                                                                                         | [190-192]                 |
| <i>Verticillium isaacii</i>        | vascular wilt             |   |   | x | N    | 2   | artichoke, tomato,<br>spinach, lettuce,<br>cauliflower,<br>eggplant, pepper,<br>and strawberry | [118,193]                 |
| <b>insect gut associated</b>       |                           |   |   |   |      |     |                                                                                                |                           |
| <i>Candida michaelii</i>           | N/A <sup>e</sup>          |   |   | x | N    | N/A | handsome fungus<br>beetle                                                                      | [194]                     |
| <b>loss of wood value</b>          |                           |   |   |   |      |     |                                                                                                |                           |
| <i>Donkioporia albidofusca</i>     |                           | x |   |   | U    | 5   | decaying wood                                                                                  | [94,195]                  |
| <i>Melastiza chateri</i>           |                           |   | x |   | U    | 5   | decaying wood                                                                                  | [94]                      |
| <i>Perenniporia luteola</i>        |                           |   |   | x | U    | 5   | decaying wood                                                                                  | [196]                     |
| <i>Phlebiopsis</i> sp.             |                           | x |   |   | N, C | 5   | decaying wood                                                                                  | [197,198]                 |
| <i>Pleurotus ostreatus</i>         | white rot                 |   |   | x | N, C | 5   | decaying wood                                                                                  | [102,136,138,<br>158,199] |
| <i>Pluteus eludens</i>             |                           |   | x |   | U    | 5   | decaying wood                                                                                  | [94]                      |
| <i>Pluteus phlebophorus</i>        |                           |   |   | x | U    | 5   | decaying wood                                                                                  | [94]                      |
| <i>Ramaria pinicola</i>            |                           |   | x |   | U    | 5   | decaying wood                                                                                  | [94]                      |
| <i>Steccherinum oreophilum</i>     |                           |   |   | x | N, C | 5   | decaying wood                                                                                  | [136,200]                 |
| <i>Trametes cubensis</i>           |                           |   | x |   | N    | 5   | decaying wood                                                                                  | [94,201-203]              |
| <i>Antrodia albobrunnea</i>        | brown rot                 |   | x |   | N, C | 5   | decaying wood                                                                                  | [204,205]                 |
| <i>Sidera lunata</i>               |                           |   |   | x | E    | 5   | decaying wood                                                                                  | [94,206]                  |

|                                      |                 |   |   |   |      |   |                            |               |
|--------------------------------------|-----------------|---|---|---|------|---|----------------------------|---------------|
| <i>Diatrype disciformis</i>          | beech barkspot  |   |   | x | N, C | 3 | decaying<br>hardwood trees | [136,158,207] |
| <i>Hyphodontia microspora</i>        | other wood rots |   | x |   | E    | 5 | decaying wood              | [208,209]     |
| <i>Phellinus ferrugineovelutinus</i> |                 | x |   |   | N, C | 3 | maple and alder            | [102,210,211] |

<sup>a</sup>UHR\_E\_AP = Ultra-high release ethanol and ultra-high release alpha-pinene.

C<sub>6</sub>C<sub>8</sub> = Racemic 3-hydroxyhexan-2-one (K6), racemic 3-hydroxyoctan-2-one (K8), and ultra-high release ethanol.

**General Longhorn** = Ultra-high release ethanol, (*E*)-6,10-dimethyl-5,9-undecadien-2-ol (*E*-fuscumol), and (*E*)-6,10-dimethyl-5,9-undecadien-2-yl (*E*-fuscumol acetate).

**Pine Sawyer** = 2-undecyloxy-1-ethanol (monochamol), ultra-high release ethanol, ultra-high release alpha-pinene, and racemic 2-methyl-6-methylene-7-octen-4-ol (ipsenol).

<sup>b</sup>N = the organism is native or reported to be present in North America, C = the organism is native or reported to be present in Canada, E = the organism is not reported or present in North America (exotic), and U = unknown status because information is lacking for Canada and North America.

<sup>c</sup>Risk associated with the organism on a 1 to 5 scale. 5 = a riskless saprophyte fungus, 4 = a saprophyte fungus capable of causing damages to plants 3 = a weakly-virulent pathogenic fungus, 2 = a moderate virulent pathogenic fungus but common in Canada, and 1 = a highly-virulent pathogenic fungus.

<sup>d</sup>Assumption based on the impact of species within the same genus.

<sup>e</sup>Not applicable.

**Supplementary Table S4:** Operational Taxonomic Units: fungal identification proportion (%) by semiochemical type at the phylum, genus and species (Top 10) taxonomic level using the ITS1 genic region. Data obtained prior to species subtraction.

| <b>Semiochemical<sup>a</sup></b> | <b>UHR_E_AP</b>     | <b>C<sub>6</sub>C<sub>8</sub></b> | <b>General Longhorn</b> | <b>Pine Sawyer</b> |
|----------------------------------|---------------------|-----------------------------------|-------------------------|--------------------|
| <b>Phylum</b>                    |                     |                                   |                         |                    |
| Ascomycota                       | 39.6                | 41.6                              | 63.9                    | 68.5               |
| Basidiomycota                    | 39.5                | 40.9                              | 24.2                    | 23.0               |
| Unidentified OTU                 | 17.5                | 14.2                              | 9.3                     | 5.6                |
| OTU unclassified below           |                     |                                   |                         |                    |
| kingdom                          | 3.1                 | 3.1                               | 2.4                     | 2.4                |
| Chytridiomycota                  | 0.3                 | 0.1                               | 0.1                     | 0.2                |
| Zygomycota                       | 0.1                 | 0.1                               | 0.1                     | 0.2                |
| Glomeromycota                    | traces <sup>b</sup> | 1.0                               | traces                  | traces             |
| Rozellomycota                    | traces              | 0.5                               | absent                  | traces             |
| <b>Genus</b>                     |                     |                                   |                         |                    |
| Unidentified OTU                 | 40.5                | 34.2                              | 29.5                    | 30.0               |
| <i>Rhodotorula</i>               | 10.0                | 11.0                              | traces <sup>b</sup>     | 3.2                |
| <i>Cystobasidium</i>             | 7.5                 | 5.5                               | traces                  | traces             |
| <i>Cryptococcus</i>              | 4.3                 | 4.1                               | 5.5                     | 6.1                |
| OTU unclassified below           |                     |                                   |                         |                    |
| family                           | 3.1                 | 3.1                               | 2.4                     | 2.4                |
| <i>Alternaria</i>                | 2.9                 | traces                            | traces                  | traces             |
| <i>Epicoccum</i>                 | 2.5                 | 5.2                               | 3.3                     | 2.2                |
| <i>Phoma</i>                     | 2.2                 | 3.2                               | traces                  | traces             |
| <i>Scopuloides</i>               | 1.8                 | traces                            | traces                  | traces             |
| <i>Verticillium</i>              | 1.8                 | 2.2                               | traces                  | traces             |
| <i>Hannaella</i>                 | traces              | 2.3                               | traces                  | traces             |
| <i>Wickerhamomyces</i>           | traces              | 1.8                               | traces                  | traces             |
| <i>Aureobasidium</i>             | traces              | traces                            | 5.3                     | traces             |
| <i>Leptographium</i>             | traces              | traces                            | 5.2                     | 4.4                |
| <i>Cladosporium</i>              | traces              | traces                            | 3.9                     | 7.3                |
| <i>Neurospora</i>                | traces              | traces                            | 3.2                     | traces             |
| <i>Kluyveromyces</i>             | absent              | traces                            | 3.0                     | traces             |
| <i>Torulaspora</i>               | traces              | traces                            | 2.3                     | traces             |
| <i>Candida</i>                   | traces              | traces                            | traces                  | 8.0                |
| <i>Mycosphaerella</i>            | traces              | traces                            | traces                  | 3.1                |
| <i>Geopyxis</i>                  | traces              | traces                            | traces                  | 2.0                |
| <b>Species</b>                   |                     |                                   |                         |                    |
| fungi sp.                        | 17.5                | 14.2                              | 9.3                     | 5.6                |
| <i>Rhodotorula mucilaginosa</i>  | 8.2                 | 8.5                               | traces <sup>b</sup>     | 2.7                |
| <i>Cystobasidium slooffiae</i>   | 6.4                 | 3.3                               | traces                  | traces             |

|                                 |        |        |        |        |
|---------------------------------|--------|--------|--------|--------|
| <i>Ascomycota</i> sp.           | 5.3    | 4.5    | 2.8    | 5.9    |
| OTU unclassified below          |        |        |        |        |
| genus                           | 9.6    | 3.1    | 2.4    | 2.4    |
| <i>Epicoccum nigrum</i>         | 2.5    | 5.2    | 3.3    | 2.2    |
| <i>Alternaria alternata</i>     | 2.5    | traces | traces | traces |
| <i>Scopuloides hydnooides</i>   | 1.8    | traces | traces | traces |
| <i>Verticillium dahliae</i>     | 1.8    | 2.2    | traces | traces |
| <i>Cystobasidium pinicola</i>   | traces | 2.2    | traces | traces |
| <i>Hannaella luteola</i>        | traces | 1.9    | traces | traces |
| <i>Wickerhamomyces</i>          |        |        |        |        |
| <i>anomalous</i>                | traces | 1.8    | traces | traces |
| <i>Leptographium piriforme</i>  | traces | traces | 5.2    | 4.4    |
| <i>Aureobasidium pullulans</i>  | traces | traces | 5.1    | traces |
| <i>Cladosporium exasperatum</i> | traces | traces | 3.9    | 6.9    |
| <i>Neurospora terricola</i>     | traces | traces | 3.2    | traces |
| <i>Kluyveromyces</i>            |        |        |        |        |
| <i>wickerhamii</i>              | absent | absent | 2.9    | traces |
| <i>Torulasporea delbrueckii</i> | absent | traces | 2.3    | traces |
| <i>Candida</i> sp.              | traces | traces | traces | 7.9    |
| <i>Mycosphaerellaceae</i> sp.   | traces | traces | traces | 3.0    |

<sup>a</sup>UHR\_E\_AP = Ultra-high release ethanol and ultra-high release alpha-pinene.

C<sub>6</sub>C<sub>8</sub> = Racemic 3-hydroxyhexan-2-one (K6), racemic 3-hydroxyoctan-2-one (K8), and ultra-high release ethanol.

**General Longhorn** = Ultra-high release ethanol, (*E*)-6,10-dimethyl-5,9-undecadien-2-ol (*E*-fuscumol), and (*E*)-6,10-dimethyl-5,9-undecadien-2-yl (*E*-fuscumol acetate).

**Pine Sawyer** = 2-undecyloxy-1-ethanol (mono-chamol), ultra-high release ethanol, ultra-high release alpha-pinene, and racemic 2-methyl-6-methylene-7-octen-4-ol (ipsenol).

<sup>b</sup>Below 0.01% or not in the top 10 for this semiochemical.

**Supplementary Table S5:** Unique oomycete species detected in the different semiochemicals after proceeding with species subtraction and using the ITS1 genic region.

| General Longhorn                         | Semiochemical <sup>a</sup>    |                                                    |
|------------------------------------------|-------------------------------|----------------------------------------------------|
|                                          | C <sub>6</sub> C <sub>8</sub> | C <sub>6</sub> C <sub>8</sub> and General Longhorn |
| Species                                  |                               |                                                    |
| <i>Peronospora farinosa</i>              | <i>Pythium</i> sp. CAL-2011e  | <i>Pythium</i> sp. BG01                            |
| <i>Peronospora</i> sp. isolate 079405,59 |                               | <i>Pythium</i> sp. P3862                           |
| <i>Peronospora</i> sp. UPS F-119986      |                               | No blast hit                                       |
| <i>Peronospora sparsa</i>                |                               |                                                    |

*Peronospora viciae*

*Pythium aff. hypogynum*

*Pythium* sp. AvdB-2012

*Pythium* sp. BP2013k

*Pythium* sp. CAL-2011f

*Pythium* sp. P19300/1/3

*Saprolegnia* sp. SAP1

---

|        |    |   |   |
|--------|----|---|---|
| Total: | 11 | 1 | 3 |
|--------|----|---|---|

---

<sup>a</sup> **General Longhorn** = Ultra-high release ethanol, (*E*)-6,10-dimethyl-5,9-undecadien-2-ol (*E*-fuscumol), and (*E*)-6,10-dimethyl-5,9-undecadien-2-yl (*E*-fuscumol acetate).

**C<sub>6</sub>C<sub>8</sub>** = Racemic 3-hydroxyhexan-2-one (K6), racemic 3-hydroxyoctan-2-one (K8), and ultra-high release ethanol.

**Supplementary Table S6:** Operational taxonomic units: oomycete identification proportion (%) by semiochemical type at the phylum, genus and species (top 10) taxonomic levels using the ITS1 genic region.

---

| Semiochemical <sup>a</sup>        | UHR_E_AP | C <sub>6</sub> C <sub>8</sub> | General Longhorn    | Pine Sawyer |
|-----------------------------------|----------|-------------------------------|---------------------|-------------|
| <b>Phylum</b>                     |          |                               |                     |             |
| Oomycota                          | 73.9     | 73.4                          | 99.9                | 96.9        |
| OTU unclassified<br>below kingdom | 26.1     | 26.6                          | 0.01                | 3.02        |
| <b>Genus</b>                      |          |                               |                     |             |
| <i>Peronospora</i>                | 38.7     | 8.55                          | 64.1                | 9.39        |
| OTU unclassified<br>below family  | 26.1     | 26.6                          | 0.01                | 0.30        |
| <i>Phytophthora</i>               | 18.4     | 46.5                          | 16.3                | absent      |
| <i>Pythium</i>                    | 13.1     | 14.4                          | 17.5                | 0.14        |
| <i>Hyaloperonospora</i>           | 1.90     | 2.68                          | 0.87                | 0.15        |
| <i>Plasmopara</i>                 | 1.72     | absent                        | 0.13                | absent      |
| <i>Basidiophora</i>               | 0.13     | 1.34                          | 1.07                | 0.01        |
| <i>Saprolegnia</i>                | absent   | absent                        | traces <sup>b</sup> | traces      |
| <b>Species</b>                    |          |                               |                     |             |
| <i>Peronospora<br/>manshurica</i> | 26.7     | 0.67                          | 61.3                | 84.9        |
| OTU unclassified<br>below genus   | 26.1     | 26.6                          | traces <sup>b</sup> | 3.02        |
| <i>Phytophthora</i> sp.           | 18.04    | 46.2                          | 16.3                | traces      |
| <i>Peronospora aestivalis</i>     | 8.20     | 2.82                          | 1.36                | 1.47        |

|                                    |        |        |                 |        |
|------------------------------------|--------|--------|-----------------|--------|
| <i>Pythium</i> sp. CAL-2011e       | 4.61   | 11.4   | NA <sup>c</sup> | NA     |
| <i>Pythium hypogynum</i>           | 4.14   | 1.63   | traces          | traces |
| <i>Peronospora alta</i>            | 2.11   | 4.59   | 0.002           | 3.16   |
| <i>Pythium</i> sp. BG01            | 1.80   | NA     | 17.1            | NA     |
| <i>Plasmopara viticola</i>         | 1.72   | NA     | traces          | traces |
| <i>Hyaloperonospora brassicae</i>  | 1.42   | traces | 0.75            | 0.39   |
| <i>Hyaloperonospora parasitica</i> | traces | 2.43   | 0.001           | 1.10   |
| <i>Basidiophora entospora</i>      | traces | 1.34   | 1.07            | traces |
| <i>Pythium catenulatum</i>         | NA     | 0.32   | 0.23            | traces |
| <i>Peronospora polygoni</i>        | 0.01   | traces | 0.49            | 2.95   |
| <i>Peronospora variabilis</i>      | traces | traces | 0.40            | 0.83   |
| <i>Peronospora sepium</i>          | traces | traces | 0.19            | traces |
| <i>Pythium</i> sp. 3862            | traces | traces | traces          | 0.96   |
| <i>Peronospora arthurii</i>        | traces | NA     | traces          | 0.29   |

<sup>a</sup>UHR\_E\_AP = Ultra-high release ethanol and ultra-high release alpha-pinene.

C<sub>6</sub>C<sub>8</sub> = Racemic 3-hydroxyhexan-2-one (K6), racemic 3-hydroxyoctan-2-one (K8), and ultra-high release ethanol.

**General Longhorn** = Ultra-high release ethanol, (*E*)-6,10-dimethyl-5,9-undecadien-2-ol (*E*-fusicumol), and (*E*)-6,10-dimethyl-5,9-undecadien-2-yl (*E*-fusicumol acetate).

**Pine Sawyer** = 2-undecyloxy-1-ethanol (monochamol), ultra-high release ethanol, ultra-high release alpha-pinene, and racemic 2-methyl-6-methylene-7-octen-4-ol (ipsenol).

<sup>b</sup>Below 0.01% or not in the top 10 for this semiochemical.

<sup>c</sup>Not applicable or not in the top 10 for this semiochemical.

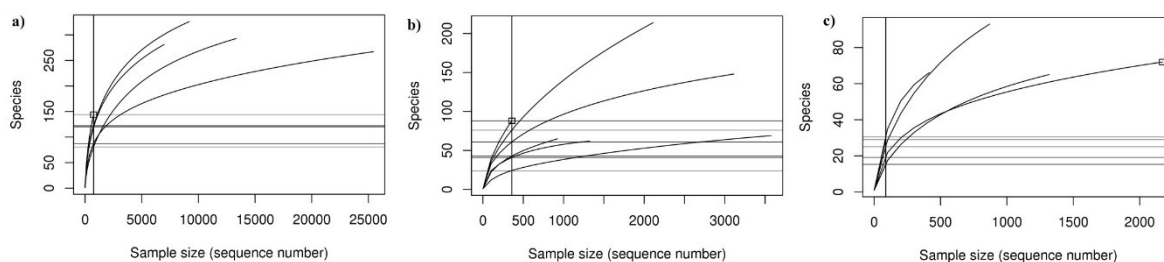

**Supplementary Figure S5:** Rarefaction curves (number of sequences obtained for each species) for a) spore trap samples and their respective b) insect trap samples (original data), and c) insect trap samples (subtracted data) to visualize sequencing depth.
